# Supplementary material
Source: PubMed Central journal article supplement (PMC4760502)
Supplement: table1.pdf [file table1.pdf]

**Table 1:**

Center of the face

|                      | M1/LH                                                                                 |                                             | M1/RH                                                 |                              | M2/LH                                      |                      | M2/RH                                    |                      |
|----------------------|---------------------------------------------------------------------------------------|---------------------------------------------|-------------------------------------------------------|------------------------------|--------------------------------------------|----------------------|------------------------------------------|----------------------|
|                      | Coordinates                                                                           | T-score                                     | Coordinates                                           | T-score                      | Coordinates                                | T-score              | Coordinates                              | T-score              |
| <b>Orbitofrontal</b> |                                                                                       |                                             |                                                       |                              |                                            |                      |                                          |                      |
| 11                   | -7; 26; 11                                                                            | 4.09                                        | 6; 24; 9                                              | 4.38                         |                                            |                      | 7; 20; 8<br>12; 18; 10                   | 3.35<br>6.61         |
| 11/13                | -11; 14; 6                                                                            | 5.37                                        | 10; 15; 9                                             | 8.17                         | -11; 11; 5                                 | 6.81                 | 10; 13; 7<br>6; 11; 5                    | 6.09<br>6.90         |
| <b>Prefrontal</b>    |                                                                                       |                                             |                                                       |                              |                                            |                      |                                          |                      |
| 9/46v                | -18; 16; 11<br>-15; 15; 13                                                            | 8.05<br>7.54                                | 14; 16; 11<br>14; 13; 13                              | 6.2<br>6.82                  | -16; 15; 10                                | 9.85                 | 12; 18; 10<br>13; 13; 11                 | 6.61<br>6.38         |
| <b>Premotor</b>      |                                                                                       |                                             |                                                       |                              |                                            |                      |                                          |                      |
| F5a/44               | -21; 10; 7<br>-24; 9; 6                                                               | 5.89<br>7.25                                | 21; 10; -3<br>17; 9; 9                                | 4.28<br>7.39                 | -23; 4; 5<br>-11; 3; 9                     | 3.97<br>3.8          | 21; 6; 3<br>16; 4; 7                     | 8.17<br>9.53         |
| F4/PMZ/F5p           | -20; 5; 11<br>-20; -3; 16                                                             | 8.7<br>20.85                                | 17; 4; 13<br>16; -5; 16                               | 5.65<br>28.11                | -15; -1; 9<br>-20; -3; 11                  | 5.43<br>5.78         | 17; -1; 11                               | 7.77                 |
| F7                   |                                                                                       |                                             | 2; 6; 23<br>3; 1; 22                                  | 6.19<br>5.95                 | -2; 5; 18                                  | 4.37                 | 2; 2; 18                                 | 9.07                 |
| ProM                 | -23; -5; 0                                                                            | 4.17                                        |                                                       |                              | -21; 5; 0                                  | 4.63                 |                                          |                      |
| <b>Sensorimotor</b>  |                                                                                       |                                             |                                                       |                              |                                            |                      |                                          |                      |
| 3a                   |                                                                                       |                                             |                                                       |                              | -20; -3; 11                                | 5.78                 | 11; -4; 14                               | 3.69                 |
| 1/3b                 | -23; -9; 13                                                                           | 6.84                                        |                                                       |                              | -14; -12; 15<br>-8; -16; 18                | 7.41<br>4.86         | 14; -11; 14                              | 9.26                 |
| 2                    | -20; -12; 9                                                                           | 14.39                                       | 20; -12; 12                                           | 13.07                        | -26; -5; 5<br>-21; -10; 12                 | 4.10<br>8.43         | 26; -3; 6<br>21; -9; 11                  | 4.43<br>10.77        |
| SII/PV               | -16; -4; 7<br>-13; -11; 6                                                             | 15.31<br>4.42                               | 13; -6; 8                                             | 12.73                        | -17; -6; 5                                 | 15.72                | 16; -5; 6                                | 17.49                |
| <b>Insular</b>       |                                                                                       |                                             |                                                       |                              |                                            |                      |                                          |                      |
| Pi                   | -19; -3; 0                                                                            | 6.26                                        | 16; -4; 1                                             | 4.09                         | -19; -3; 0<br>-18; 0; -3                   | 8.06<br>7.16         | 19; -2; 0<br>15; 2; -2                   | 12.25<br>5.16        |
| Ipro                 | -19; 1; -2                                                                            | 4.81                                        |                                                       |                              |                                            |                      |                                          |                      |
| Pir                  |                                                                                       |                                             |                                                       |                              |                                            |                      | 9; -8; -12                               | 3.55                 |
| <b>Cingulate</b>     |                                                                                       |                                             |                                                       |                              |                                            |                      |                                          |                      |
| 24/32                |                                                                                       |                                             |                                                       |                              |                                            |                      | 2; 13; 9                                 | 3.92                 |
| 24a                  |                                                                                       |                                             |                                                       |                              | -3; 9; 14                                  | 5.21                 | 4; 6; 13                                 | 6.04                 |
| 24c                  | -3; 15; 18<br>-6; 8; 16                                                               | 3.85<br>4.81                                | 4; 9; 18<br>4; 5; 16                                  | 4.35<br>5.07                 | -4; 4; 13<br>-6; -4; 12                    | 7.57<br>4.64         | 3; 1; 14<br>6; -6; 13                    | 6.79<br>3.53         |
| 24d                  |                                                                                       |                                             |                                                       |                              | 0; -7; 10                                  | 5.81                 | 2; -10; 14                               | 3.92                 |
| <b>Parietal</b>      |                                                                                       |                                             |                                                       |                              |                                            |                      |                                          |                      |
| AIP/VIP              | -15; -15; 10                                                                          | 7.1                                         | 15; -16; 11                                           | 7.44                         |                                            |                      |                                          |                      |
| VIP                  | -10; -22; 9                                                                           | 6.61                                        | 9; -22; 10                                            | 7.12                         | -9; -17; 9                                 | 7.48                 | 9; -17; 9                                | 6.56                 |
| MIP/PE               |                                                                                       |                                             |                                                       |                              | -10; -20; 15                               | 4.53                 | 12; -21; 14                              | 4.49                 |
| PEc                  |                                                                                       |                                             | 4; -25; 11                                            | 3.88                         |                                            |                      | 4; -14; 13                               | 4.27                 |
| PGM/PEc              |                                                                                       |                                             | 2; -30; 13                                            | 6.97                         |                                            |                      |                                          |                      |
| PGM                  |                                                                                       |                                             | 3; -30; 2                                             | 9.43                         |                                            |                      | 3; -31; 1                                | 3.29                 |
| 7b/7op               | -25; -17; 8                                                                           | 6.84                                        |                                                       |                              | -21; -15; 10<br>-16; -19; 11               | 8.63<br>4.38         | 21; -13; 10<br>18; -19; 11               | 11.78<br>7.96        |
| <b>Temporal</b>      |                                                                                       |                                             |                                                       |                              |                                            |                      |                                          |                      |
| MT/MST               | -11; -23; 3                                                                           | 7.28                                        | 10; -22; 5<br>11; -26; 7                              | 6.36<br>4.62                 |                                            |                      | 15; -21; 6                               | 3.51                 |
| <b>Occipital</b>     |                                                                                       |                                             |                                                       |                              |                                            |                      |                                          |                      |
| PIP/V3A              | -10; -27; 6                                                                           | 6.19                                        | 9; -25; 3                                             | 4.09                         | -16; -29; 8                                | 4.11                 | 14; -26; 6                               | 4.58                 |
| V3A/PGM              | -5; -30; 1                                                                            | 9.85                                        | 5; -29; 2                                             | 8.62                         |                                            |                      |                                          |                      |
| V3A                  | -12; -35; 10                                                                          | 4.9                                         |                                                       |                              |                                            |                      |                                          |                      |
| V2                   | -11; -25; -3<br>-8; -29; -4<br>-5; -43; -4                                            | 4.67<br>5.96<br>4.12                        | 10; -26; -3<br>5; -32; -4<br>6; -41; -7               | 4.23<br>3.43<br>4.17         | -15; -29; -2<br>-10; -27; 0<br>-5; -35; -1 | 3.92<br>4.10<br>5.40 | 17; -25; -1<br>11; -28; -4<br>8; -33; -3 | 3.93<br>5.64<br>4.35 |
| V1                   | -9; -36; -6<br>-14; -36; -2<br>-10; -37; 1<br>-6; -40; 1<br>-8; -41; 7<br>-12; -41; 3 | 6.5<br>6.07<br>3.64<br>3.76<br>5.49<br>3.89 | 10; -33; -4<br>11; -37; -4<br>14; -37; 1<br>8; -41; 6 | 3.21<br>4.00<br>4.22<br>4.05 | -15; -38; -1<br>-6; -41; 1<br>-6; -40; -7  | 5.32<br>5.46<br>5.69 | 15; -36; 3<br>8; -41; 1<br>6; -42; -4    | 5.02<br>5.24<br>3.44 |

**Legend Table 1:** Activations elicited by the contrast between the center of the face stimulation and the fixation. The results are given for both monkeys (M1 and M2) and both hemispheres (LH and RH). For each activation, the coordinates of the peak are given and the corresponding t-score. Discrepancies between the table and the results displayed in Figure 2 and 3 can occur when: 1) the activation encompasses a region but do not present any local maximum; 2) the activation is too small to be visible on the projection onto the flat map. Most of the regions were identified and labeled in reference to the nomenclature used in the Lewis and Van Essen atlas available in Caret and in the Scalable brain atlas (<http://scalablebrainatlas.incf.org>).
