# Supplementary material
Source: PubMed Central journal article supplement (PMC4760502)
Supplement: table2.pdf [file table2.pdf]

**Table 2 :****Periphery of the face**

|                             | M1/LH          |         | M1/RH        |         | M2/LH          |         | M2/RH         |         |
|-----------------------------|----------------|---------|--------------|---------|----------------|---------|---------------|---------|
|                             | Coordinates    | T-score | Coordinates  | T-score | Coordinates    | T-score | Coordinates   | T-score |
| <b><i>Orbitofrontal</i></b> |                |         |              |         |                |         |               |         |
| 11                          | -8 ; 25 ; 10   | 3.50    | 4 ; 24 ; 9   | 4.72    |                |         |               |         |
| 11/13                       | -13 ; 16 ; 10  | 5.59    | 11 ; 19 ; 10 | 5.59    |                |         |               |         |
|                             | -16 ; 15 ; 7   | 4.40    | 8 ; 16 ; 9   | 3.55    |                |         |               |         |
|                             |                |         | 15 ; 16 ; 8  | 4.36    |                |         |               |         |
| <b><i>Prefrontal</i></b>    |                |         |              |         |                |         |               |         |
| 46                          | -7 ; 22 ; 16   | 4.72    | 8 ; 17 ; 14  | 4.00    | -9 ; 20 ; 10   | 4.33    | 6 ; 19 ; 10   | 3.40    |
|                             | -14 ; 14 ; 16  | 4.71    |              |         | -13 ; 16 ; 11  | 4.63    | 11 ; 17 ; 10  | 4.22    |
| 9/46v                       | -18 ; 12 ; 11  | 3.09    | 15 ; 13 ; 13 | 5.52    | -15 ; 15 ; 11  | 5.09    | 14 ; 12 ; 12  | 4.30    |
| 8b                          |                |         |              |         |                |         | 11 ; 7 ; 17   | 3.37    |
| FEF                         |                |         |              |         | -14 ; 4 ; 13   | 4.22    | 12 ; 4 ; 13   | 3.84    |
| <b><i>Premotor</i></b>      |                |         |              |         |                |         |               |         |
| F5a/44                      | -21 ; 10 ; 7   | 5.79    | 16 ; 11 ; 11 | 7.01    |                |         | 22 ; 6 ; 4    | 4.25    |
| F4/PMZ/F5p                  | -20 ; 6 ; 11   | 4.30    | 17 ; 8 ; 8   | 6.00    | -15 ; -2 ; 11  | 4.04    | 15 ; -1 ; 10  | 3.97    |
|                             | -18 ; -1 ; 18  | 10.97   | 16 ; -5 ; 16 | 15.28   |                |         |               |         |
| F2                          | -12 ; 2 ; 16   | 4.01    |              |         |                |         |               |         |
| ProM                        | -24 ; 7 ; 2    | 3.10    |              |         |                |         |               |         |
| <b><i>Sensorimotor</i></b>  |                |         |              |         |                |         |               |         |
| F1                          |                |         | 1 ; -7 ; 22  | 4.01    |                |         |               |         |
|                             |                |         | 2 ; -14 ; 21 | 3.90    |                |         |               |         |
| 1/3b                        | -22 ; -10 ; 14 | 4.87    |              |         | -19 ; -10 ; 12 | 4.50    | 20 ; -9 ; 12  | 5.85    |
|                             |                |         | 5 ; -14 ; 20 | 3.11    | -15 ; -9 ; 13  | 4.86    | 14 ; -11 ; 14 | 6.78    |
| 2                           | -18 ; -12 ; 16 | 4.18    | 2 ; -12 ; 13 | 7.60    | -11 ; -14 ; 15 | 5.74    | 27 ; -8 ; 6   | 3.24    |
| SII/PV                      | -16 ; -4 ; 16  | 9.83    | 13 ; -6 ; 8  | 11.64   | -16 ; -6 ; 5   | 7.47    | 15 ; -6 ; 6   | 7.53    |
|                             | -22 ; -9 ; 6   | 4.14    |              |         |                |         |               |         |
|                             | -14 ; -10 ; 5  | 4.76    | 13 ; -10 ; 4 | 5.05    |                |         |               |         |
|                             | -18 ; -16 ; 5  | 4.18    | 15 ; -15 ; 5 | 5.07    |                |         |               |         |
| <b><i>Insular</i></b>       |                |         |              |         |                |         |               |         |
| Ig                          |                |         |              |         | -24 ; -6 ; -2  | 5.15    | 23 ; -7 ; -1  | 4.20    |
| Pi                          | -20 ; -4 ; 0   | 7.99    | 16 ; -5 ; 0  | 3.68    |                |         | 19 ; -2 ; 0   | 5.36    |
|                             |                |         | 18 ; -3 ; 1  | 3.35    |                |         |               |         |
| Ipro                        |                |         | 17 ; -6 ; -4 | 3.18    |                |         |               |         |
| <b><i>Cingulate</i></b>     |                |         |              |         |                |         |               |         |
| 24/32                       |                |         | 1 ; 13 ; 8   | 4.71    |                |         | 1 ; 12 ; 7    | 3.97    |
| 24a                         |                |         | 0 ; 9 ; 11   | 3.53    |                |         |               |         |
| 24c                         | -6 ; 7 ; 16    | 3.20    | 4 ; 7 ; 17   | 7.12    | -5 ; 3 ; 14    | 3.41    | 0 ; 1 ; 17    | 5.36    |
|                             | -5 ; 4 ; 21    | 3.45    | 1 ; 3 ; 12   | 3.90    | -4 ; -6 ; 13   | 3.85    |               |         |
|                             | -9 ; -2 ; 14   | 3.21    | 1 ; 0 ; 12   | 3.91    |                |         |               |         |
| 24d                         |                |         | 1 ; -5 ; 13  | 4.25    |                |         | 2 ; -11 ; 14  | 3.99    |
|                             |                |         | 4 ; -9 ; 11  | 4.60    |                |         |               |         |
|                             | -10 ; -12 ; 9  | 3.84    | 4 ; -13 ; 11 | 4.99    |                |         |               |         |
|                             | -9 ; -15 ; 13  | 3.21    | 4 ; -16 ; 10 | 5.08    |                |         |               |         |
| <b><i>Parietal</i></b>      |                |         |              |         |                |         |               |         |

|                  |              |       |             |       |              |      |             |       |
|------------------|--------------|-------|-------------|-------|--------------|------|-------------|-------|
| AIP/VIP          | -19; -13; 10 | 13.34 | 16; -15; 11 | 11.96 | -11; -14; 11 | 4.43 |             |       |
| VIP              | -10; -18; 11 | 3.79  |             |       |              |      |             |       |
|                  | -9; -20; 11  | 4.32  | 9; -22; 10  | 4.9   | -10; -16; 9  | 5.08 | 9; -17; 9   | 4.17  |
| MIP              | -12; -20; 14 | 4.47  |             |       | -19; -22; 13 | 4.49 | 12; -17; 14 | 3.11  |
|                  | -10; -24; 17 | 5.39  |             |       |              |      |             |       |
| PEc              |              |       | 5; -19; 13  | 4.93  |              |      | 4; -16; 14  | 3.5   |
|                  | -8; -28; 17  | 3.37  | 0; -21; 19  | 3.61  |              |      |             |       |
| PGM/PEc          | -7; -24; 16  | 5.05  | 3; -22; 11  | 4.93  |              |      |             |       |
| PGM              | -3; -28; 13  | 6.19  | 1; -29; 13  | 11.32 |              |      |             |       |
| 7b/7op           | -23; -21; 10 | 8.51  | 17; -21; 11 | 6.21  | -15; -19; 10 | 3.57 | 21; -15; 10 | 4.69  |
| <b>Temporal</b>  |              |       |             |       |              |      |             |       |
| MST              | -11; -22; 7  | 4.02  | 13; -20; 4  | 5.28  |              |      |             |       |
|                  | -21; -26; 8  | 4.97  |             |       |              |      |             |       |
| MT/MST           | -12; -21; 4  | 4.67  | 16; -20; 6  | 6.61  |              |      |             |       |
|                  |              |       | 20; -19; 5  | 9.70  |              |      |             |       |
|                  | -13; -23; 1  | 3.74  | 13; -24; 3  | 3.94  |              |      |             |       |
| TPt              | -22; -20; 5  | 7.91  | 24; -17; 5  | 9.66  | -22; -16; 4  | 8.08 | 21; -16; 5  | 15.05 |
| TS               | -29; -11; 0  | 6.73  | 25; -8; 0   | 8.33  | -24; -6; -2  | 5.15 | 26; -4; -2  | 6.47  |
|                  | -22; -11; -1 | 4.57  |             |       | -25; -12; 2  | 3.29 | 26; -8; 0   | 3.83  |
|                  | -25; 1; -3   | 5.70  | 24; 0; -3   | 4.88  |              |      |             |       |
| TPO              | -18; -5; -8  | 3.74  | 21; -10; -1 | 6.16  | -21; 4; -6   | 3.91 | 23; 4; -4   | 3.13  |
|                  |              |       | 18; -1; -9  | 3.22  |              |      |             |       |
| <b>Occipital</b> |              |       |             |       |              |      |             |       |
| PIP/V3A          | -11; -29; 5  | 5.57  |             |       |              |      | 15; -29; 8  | 3.74  |
| V3A/PGM          | -5; -30; 0   | 7.35  | 4; -30; 2   | 7.23  |              |      |             |       |
| V3/V3A           |              |       | 9; -32; 4   | 4.63  |              |      |             |       |
|                  |              |       | 15; -31; 1  | 5.14  |              |      |             |       |
| V4               |              |       |             |       | -12; -13; -8 | 4.08 |             |       |
| V2               | -13; -26; -8 | 3.31  | 10; -25; -3 | 4.09  |              |      |             |       |
|                  | -8; -27; -4  | 6.32  | 6; -27; -3  | 4.08  |              |      |             |       |
|                  | -10; -32; -6 | 3.75  | 4; -33; -4  | 4.64  |              |      |             |       |
| V1               | -12; -34; -5 | 4.96  | 11; -34; -4 | 4.49  |              |      | 16; -26; -1 | 3.45  |
|                  | -11; -35; -4 | 4.93  | 4; -36; -4  | 4.17  |              |      | 13; -29; 0  | 3.52  |
|                  | -6; -37; -6  | 3.69  | 15; -37; 0  | 5.47  | -12; -36; -2 | 3.17 | 6; -38; 0   | 4.27  |
|                  | -11; -40; 6  | 3.79  | 15; -38; -5 | 4.31  |              |      | 9; -40; 0   | 3.97  |
|                  | -5; -42; -3  | 4.23  | 7; -40; 7   | 5.66  |              |      |             |       |

**Legend Table 2:** Activations elicited by the contrast between the periphery of the face stimulation and the fixation. Same as in Table 1.
