# Supplementary material
Source: PubMed Central journal article supplement (PMC4760502)
Supplement: table3.pdf [file table3.pdf]

**Table 3 :****Shoulders**

|                      | M1/LH        |         | M1/RH       |         | M2/LH        |         | M2/RH        |         |
|----------------------|--------------|---------|-------------|---------|--------------|---------|--------------|---------|
|                      | Coordinates  | T-score | Coordinates | T-score | Coordinates  | T-score | Coordinates  | T-score |
| <b>Orbitofrontal</b> |              |         |             |         |              |         |              |         |
| 11                   |              |         |             |         |              |         | 7; 20; 7     | 3.54    |
|                      |              |         |             |         |              |         | 12; 17; 6    | 4.42    |
| 11/13                |              |         |             |         |              |         | 6; 11; 5     | 4.37    |
| <b>Prefrontal</b>    |              |         |             |         |              |         |              |         |
| 46                   | -16; 10; 16  | 5.43    |             |         | -7; 13; 9    | 3.2     | 8; 11; 10    | 4       |
|                      |              |         |             |         |              |         | 9; 9; 9      | 3.93    |
| 9/46v                | -14; 15; 12  | 5.95    | 13; 13; 12  | 3.75    | -13; 12; 13  | 3.31    | 16; 12; 11   | 3.75    |
| FEF                  |              |         |             |         | -13; 3; 53   | 3.49    | 12; 4; 13    | 3.73    |
| <b>Premotor</b>      |              |         |             |         |              |         |              |         |
| F5a/44               |              |         |             |         | -14; 4; 6    | 6.05    | 20; 9; 6     | 3.39    |
|                      |              |         |             |         |              |         | 20; 7; 4     | 3.71    |
|                      |              |         |             |         |              |         | 12; 5; 9     | 3.13    |
| F4/PMZ/F5p           | -16; 2; 17   | 3.1     | 15; -5; 18  | 3.67    | -13; -2; 8   | 4.51    |              |         |
|                      | -17; -1; 18  | 3.73    | 14; 0; 14   | 5.75    | -16; -3; 13  | 4.35    | 16; -1; 9    | 3.99    |
| F7                   |              |         | 4; 3; 21    | 5.74    |              |         |              |         |
| F2                   |              |         | 8; -2; 20   | 3.3     | -8; -3; 14   | 3.98    |              |         |
| ProM                 |              |         |             |         | -18; 7; 1    | 3.72    |              |         |
| <b>Sensorimotor</b>  |              |         |             |         |              |         |              |         |
| 3a                   |              |         | 8; -13; 20  | 3.82    | -21; -7; 8   | 4.14    |              |         |
|                      |              |         | 11; -9; 18  | 3.14    | -15; -6; 10  | 4.87    |              |         |
| 1/3b                 |              |         | 13; -14; 18 | 3.91    | -16; -10; 13 | 5.88    | -16; -10; 13 | 5.88    |
|                      |              |         | 8; -18; 22  | 5.05    | -14; -12; 15 | 5.12    |              |         |
| 2                    | -18; -13; 14 | 5.03    |             |         |              |         | 18; -14; 56  | 3.23    |
| SII/PV               | -16; -4; 6   | 7.89    | 13; -3; 18  | 6.6     | -15; -7; 4   | 7.81    | 15; -6; 4    | 8.34    |
|                      | -16; -9; 4   | 5.96    | 13; -9; 16  | 8.4     |              |         |              |         |
|                      | -13; -12; 5  | 3.21    | 14; -10; 3  | 5.39    |              |         |              |         |
| <b>Insular</b>       |              |         |             |         |              |         |              |         |
| Pi                   | -18; -3; 0   | 6.54    | 16; -5; 1   | 6.8     | -18; -2; -3  | 5.36    | 19; -2; 0    | 5.1     |
| <b>Cingulate</b>     |              |         |             |         |              |         |              |         |
| 24a/32               | -3; 15; 18   | 3.42    |             |         |              |         | 2; 18; 5     | 4.55    |
| 24a                  | -5; 9; 16    | 4.9     |             |         | -2; 11; 14   | 3.11    |              |         |
|                      |              |         |             |         | -2; 9; 11    | 4.1     |              |         |
| 24c                  | -3; -2; 21   | 3.67    | 2; -2; 22   | 5.33    | -5; 4; 13    | 5.47    |              |         |
|                      |              |         |             |         | 0; 0; 18     | 4.91    |              |         |
|                      |              |         |             |         | -3; -3; 18   | 5.82    | 1; -4; 17    | 3.89    |
| 24d                  | -4; -10; 18  | 3.46    |             |         |              |         |              |         |
| <b>Parietal</b>      |              |         |             |         |              |         |              |         |
| VIP                  |              |         |             |         | -9; -17; 12  | 4.99    | 8; -18; 9    | 4.56    |
| MIP                  | -14; -19; 14 | 4.12    |             |         | -11; -21; 53 | 4.35    | 12; -17; 14  | 5.08    |
| PE                   |              |         |             |         | -9; -18; 17  | 7.83    | 11; -16; 16  | 6.08    |
| PEc                  | -10; -17; 11 | 5.11    | 5; -15; 11  | 4.79    |              |         | 5; -14; 14   | 3.81    |
| PGM/PEc              | -6; -25; 18  | 11.13   | 2; -26; 16  | 10.06   | -5; -17; 9   | 4.12    | 7; -19; 13   | 6.92    |
| PGM                  |              |         |             |         | -3; -26; 14  | 6.45    | 3; -15; 8    | 3.85    |
|                      |              |         |             |         | 0; -28; 5    | 3.93    | 6; -25; 14   | 8.69    |
| 7b/7op               | -22; -18; 9  | 8.18    | 20; -17; 9  | 6.06    | -18; -17; 10 | 6.76    | 21; -16; 11  | 6.19    |
| <b>Temporal</b>      |              |         |             |         |              |         |              |         |
| TPt                  | -21; -21; 6  | 3.26    | 19; -21; 6  | 3.92    | -23; -19; 6  | 3.31    | 21; -18; 6   | 5.95    |
| TPO                  | -23; -13; 1  | 5.46    | 20; -12; 0  | 8.64    |              |         |              |         |
|                      | -20; -4; -7  | 3.98    | 20; -1; -6  | 3.38    |              |         |              |         |
| <b>Occipital</b>     |              |         |             |         |              |         |              |         |
| PIP/V3A              |              |         | 11; -29; 2  | 3.44    |              |         | 11; -27; 7   | 3.59    |
| V3A                  |              |         |             |         | -11; -29; 6  | 3.28    | 10; -30; 9   | 3.64    |
| V4                   |              |         |             |         | -20; -26; 2  | 3.27    | 23; -27; 2   | 3.36    |
| V2                   | -3; -36; 11  | 3.57    | 6; -36; 9   | 3.18    |              |         |              |         |
| V1                   | -15; -38; 1  | 3.2     |             |         | -15; -38; -1 | 4.44    | 6; -37; -1   | 4.53    |
|                      | -12; -39; -9 | 3.41    |             |         | -6; -42; -1  | 3.51    | 10; -39; 1   | 4.15    |

**Legend Table 3:** Activations elicited by the contrast between the shoulders stimulation and the fixation. Same as in Table 1.
